# Supplementary material for: First documentation of putative mating behavior in blue sharks ( Prionace glauca ) reveals a potential reproductive area in the Northeast Atlantic
Source: Copernicus journal article supplement (doi:10.5194/we-25-213-2025), 2025-11-03
Supplement: Supplementary file [file we-25-213-2025-supplement-title-page.pdf › we-25-213-2025-supplement-title-page.pdf]

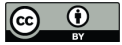

## *Supplement of*

# **First documentation of putative mating behavior in blue sharks (*Prionace glauca*) reveals a potential reproductive area in the Northeast Atlantic**

**Lennart Vossгаetter et al.**

*Correspondence to:* Lennart Vossгаetter ([lenny.vossi@gmail.com](mailto:lenny.vossi@gmail.com))

- [we-25-213-2025-supplement-title-page.pdf](#)
- [Chasingbehavior.mp4](#)

The copyright of individual parts of the supplement might differ from the article licence.
